# Supplementary material for: Canagliflozin Improves Myocardial Perfusion, Fibrosis, and Function in a Swine Model of Chronic Myocardial Ischemia
Source: PubMed Central journal article supplement — J Am Heart Assoc. 2022 Dec 30;12(1):e028623. doi: 10.1161/JAHA.122.028623 (PMC9973570; doi:10.1161/jaha.122.028623), 2022-12-30
Supplement: JAH3-12-e028623-s001.pdf [file JAH3-12-e028623-s001.pdf]

# **SUPPLEMENTAL MATERIAL**

**Table S1: Antibody Catalog Numbers**

| Antibody Name       | Manufacturer             | Catalog Number |
|---------------------|--------------------------|----------------|
| <b>Akt</b>          | Cell Signaling           | 9272           |
| <b>AMPK</b>         | Cell Signaling           | 2532           |
| <b>Angiostatin</b>  | Abcam                    | 2904           |
| <b>Beta actin</b>   | Cell Signaling           | 4967           |
| <b>Connexin 43</b>  | Cell Signaling           | 83649          |
| <b>Desmin</b>       | Cell Signaling           | 4024           |
| <b>eNOS</b>         | Cell Signaling           | 32027          |
| <b>ERK1/2</b>       | Cell Signaling           | 4695           |
| <b>Filamin</b>      | Cell Signaling           | 4762           |
| <b>GAPDH</b>        | Cell Signaling           | 97166          |
| <b>Isolectin B4</b> | Thermo Fisher Scientific | I32450         |
| <b>Jak2</b>         | Cell Signaling           | 3230           |
| <b>MCP-1</b>        | Cell Signaling           | 81559          |
| <b>MMP13</b>        | Cell Signaling           | 69926          |
| <b>mTOR</b>         | Cell Signaling           | 2972           |
| <b>p-Akt</b>        | Cell Signaling           | 4060           |
| <b>p-AMPK</b>       | Cell Signaling           | 2535           |
| <b>p-eNOS</b>       | Cell Signaling           | 9571           |
| <b>p-ERK1/2</b>     | Cell Signaling           | 4370           |
| <b>p-STAT3</b>      | Cell Signaling           | 9145           |
| <b>SMAD2/3</b>      | Cell Signaling           | 8685           |
| <b>SOD2</b>         | Cell Signaling           | 131415         |
| <b>STAT3</b>        | Cell Signaling           | 9139           |
| <b>TGFβ</b>         | Cell Signaling           | 3711           |
| <b>TIMP2</b>        | Cell Signaling           | 5738           |
| <b>Troponin I</b>   | Cell Signaling           | 13083          |
| <b>Troponin T</b>   | Cell Signaling           | 5593           |
| <b>Vimentin</b>     | Cell Signaling           | 5741           |
| <b>α-actinin</b>    | Cell Signaling           | 6487           |
| <b>α-fodrin</b>     | Cell Signaling           | 2122           |
| <b>α-SMA</b>        | Abcam                    | 7817           |

Antibodies used in this study are listed along with corresponding manufacturer and catalog numbers. AMPK, 5' adenosine monophosphate-activated protein kinase; eNOS, endothelial nitric oxide synthase; ERK, extracellular regulated kinase 1/2; GAPDH, glyceraldehyde-3-phosphate dehydrogenase; Jak2, janus kinase 2; MCP-1, monocyte chemoattractant protein-1; MMP13, matrix metalloproteinase 13; mTOR, mammalian target of rapamycin; p-, phosphorylated; STAT3, signal transducer and activator of transcription 3; SOD2; superoxide dismutase 2; TGFβ, transforming growth factor beta; TIMP2, tissue inhibitor of metalloproteinase 2; α-SMA, alpha smooth muscle actin.

FIGURE S1

AMPK

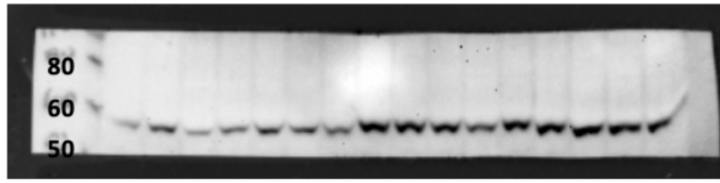

p-AMPK

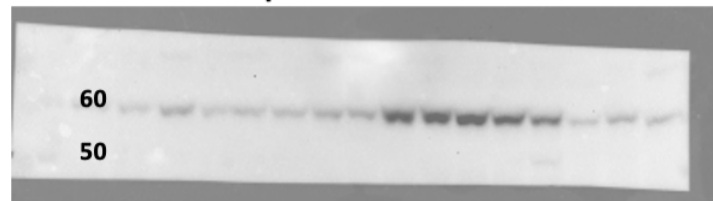

p-eNOS

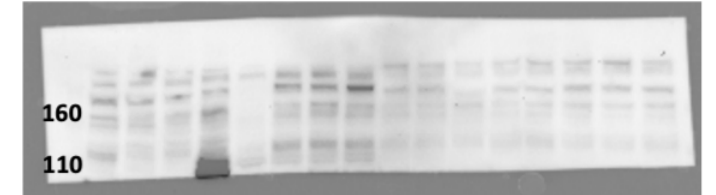

Total ERK1/2

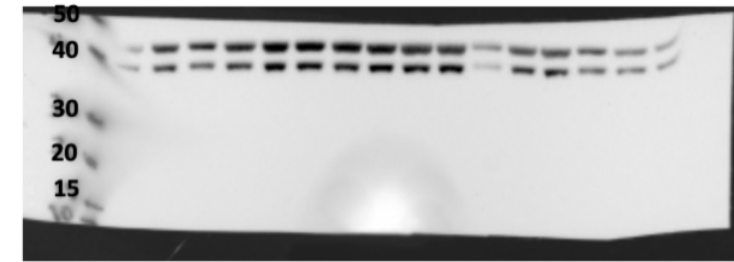

p-ERK1/2

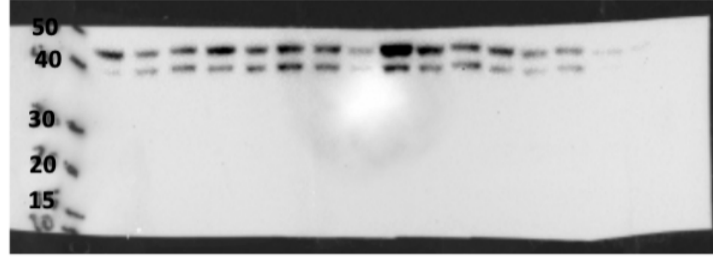

Total eNOS

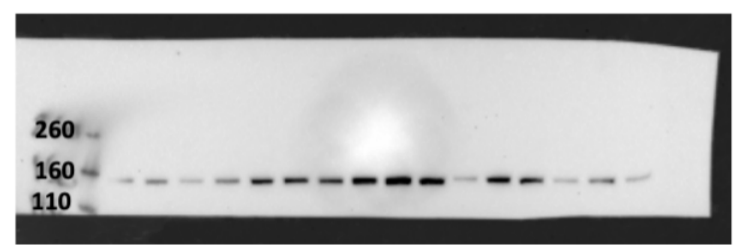

Total Akt

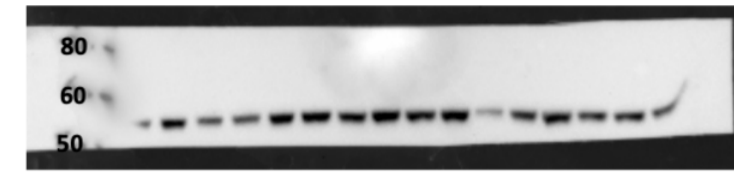

p-Akt

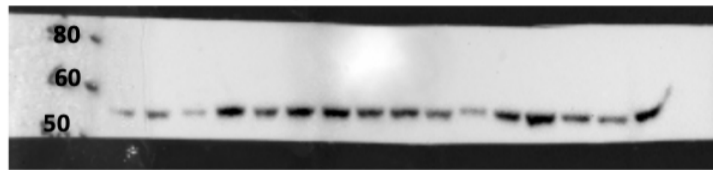

Angiostatin

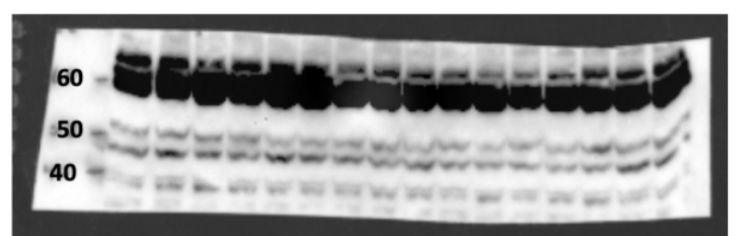

Jak2

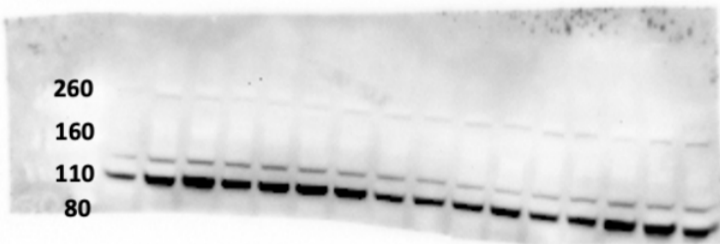

TGFβ

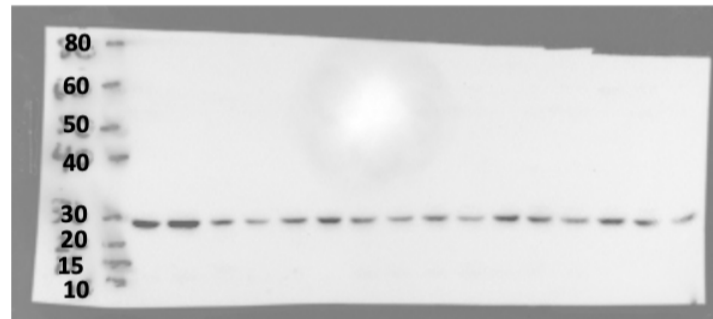

SMAD2/3

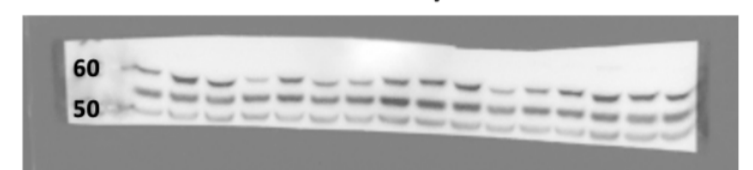

p-STAT3

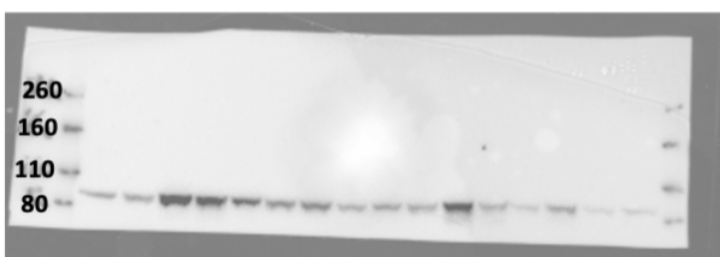

STAT3

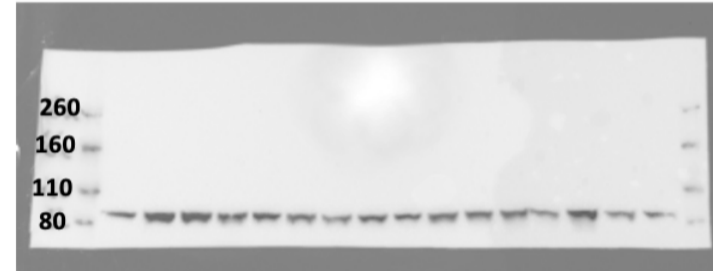

SOD2

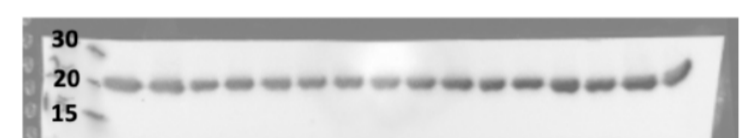

Alpha actinin

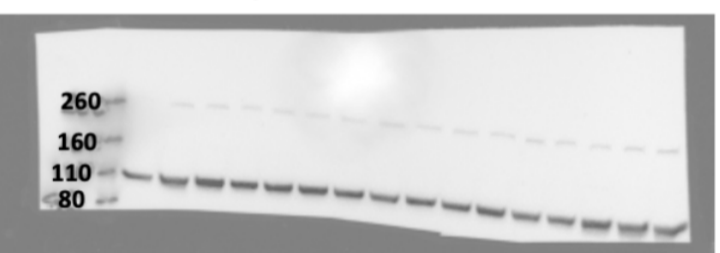

Alpha fodrin

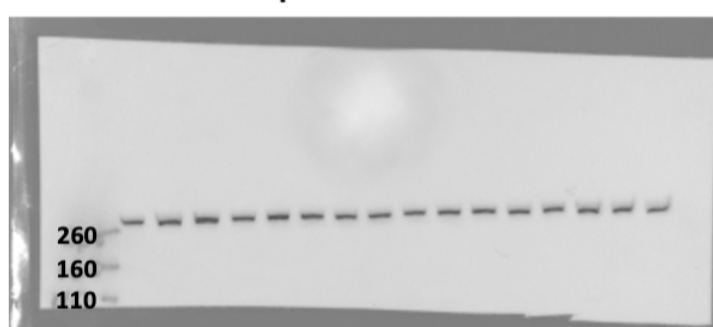

Beta Actin

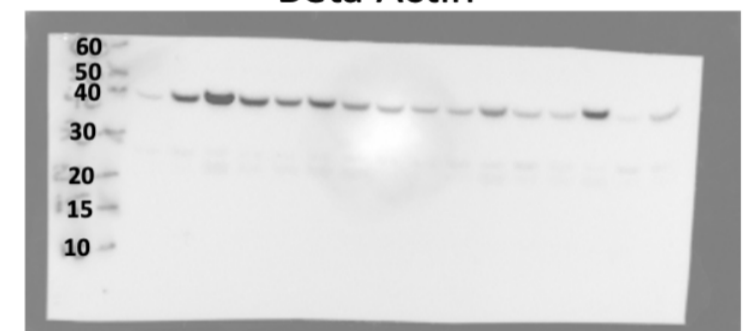

Connexin

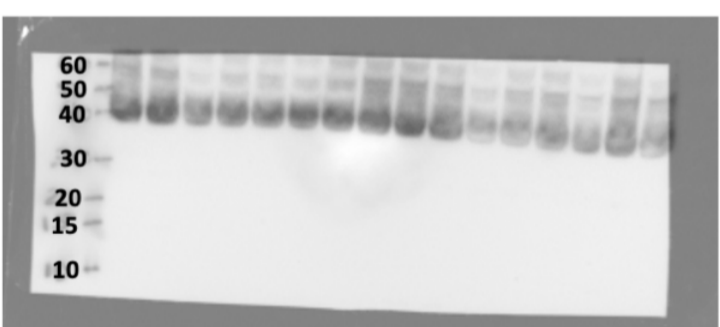

Desmin

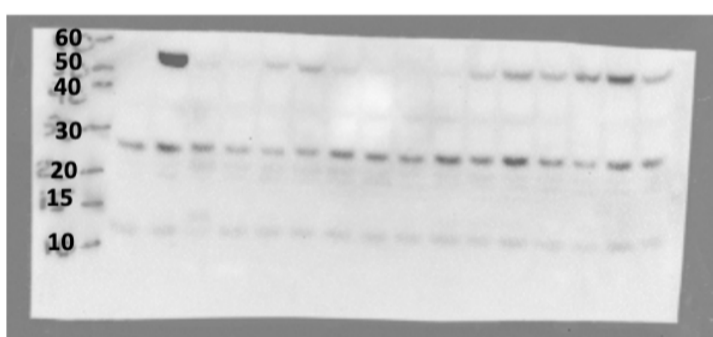

Filamin

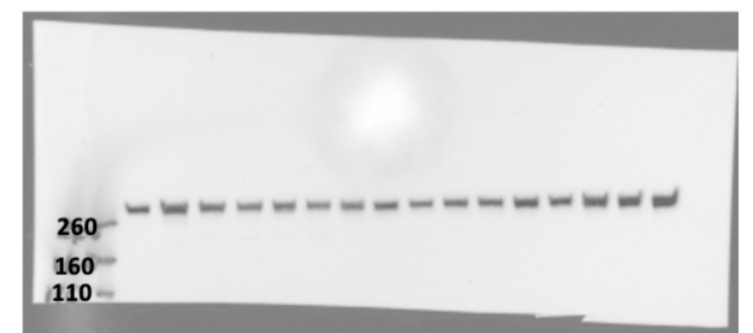

MCP-1

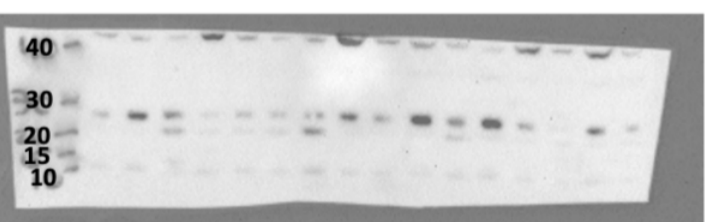

MMP13

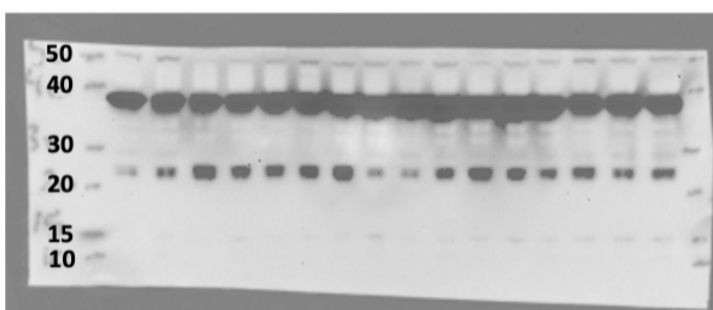

mTOR

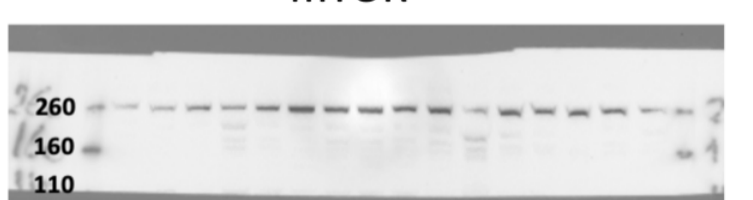

TIMP2

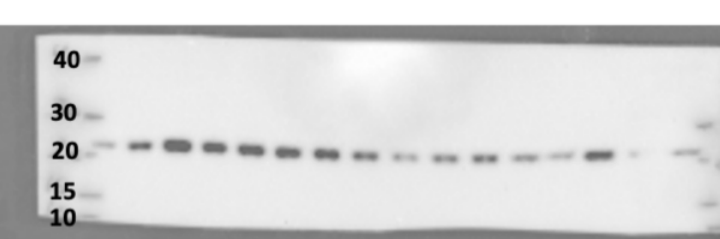

Troponin I

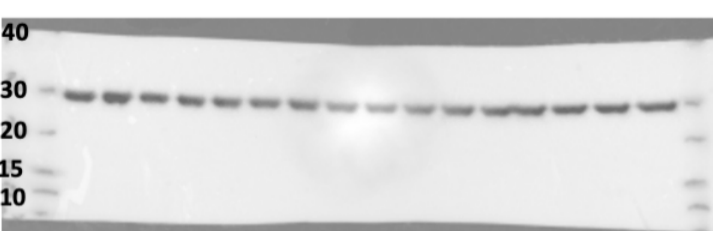

Troponin T

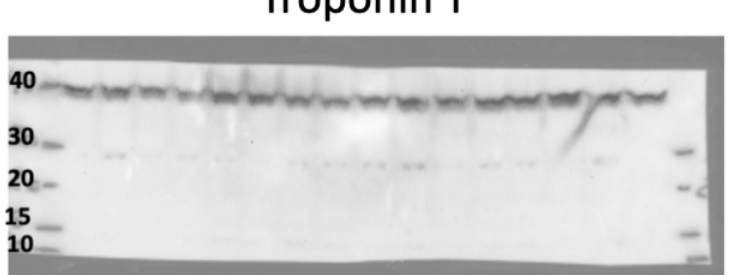

Vimentin

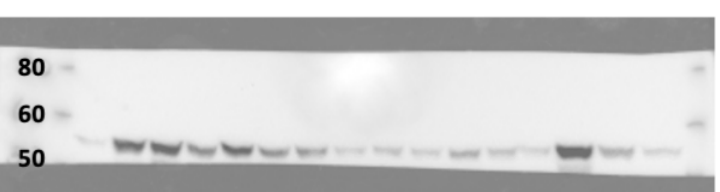

**Figure S1: Immunoblot uncropped images.** Uncropped immunoblot images with molecular weights (in kilodaltons) labeled on left. AMPK, 5' adenosine monophosphate-activated protein kinase; eNOS, endothelial nitric oxide synthase; ERK, extracellular regulated kinase 1/2; GAPDH, glyceraldehyde-3-phosphate dehydrogenase; Jak2, janus kinase 2; MCP-1, monocyte chemoattractant protein-1; MMP13, matrix metalloproteinase 13; mTOR, mammalian target of rapamycin; p-, phosphorylated; STAT3, signal transducer and activator of transcription 3; SOD2; superoxide dismutase 2; TGF $\beta$ , transforming growth factor beta; TIMP2, tissue inhibitor of metalloproteinase 2.

**FIGURE S2**

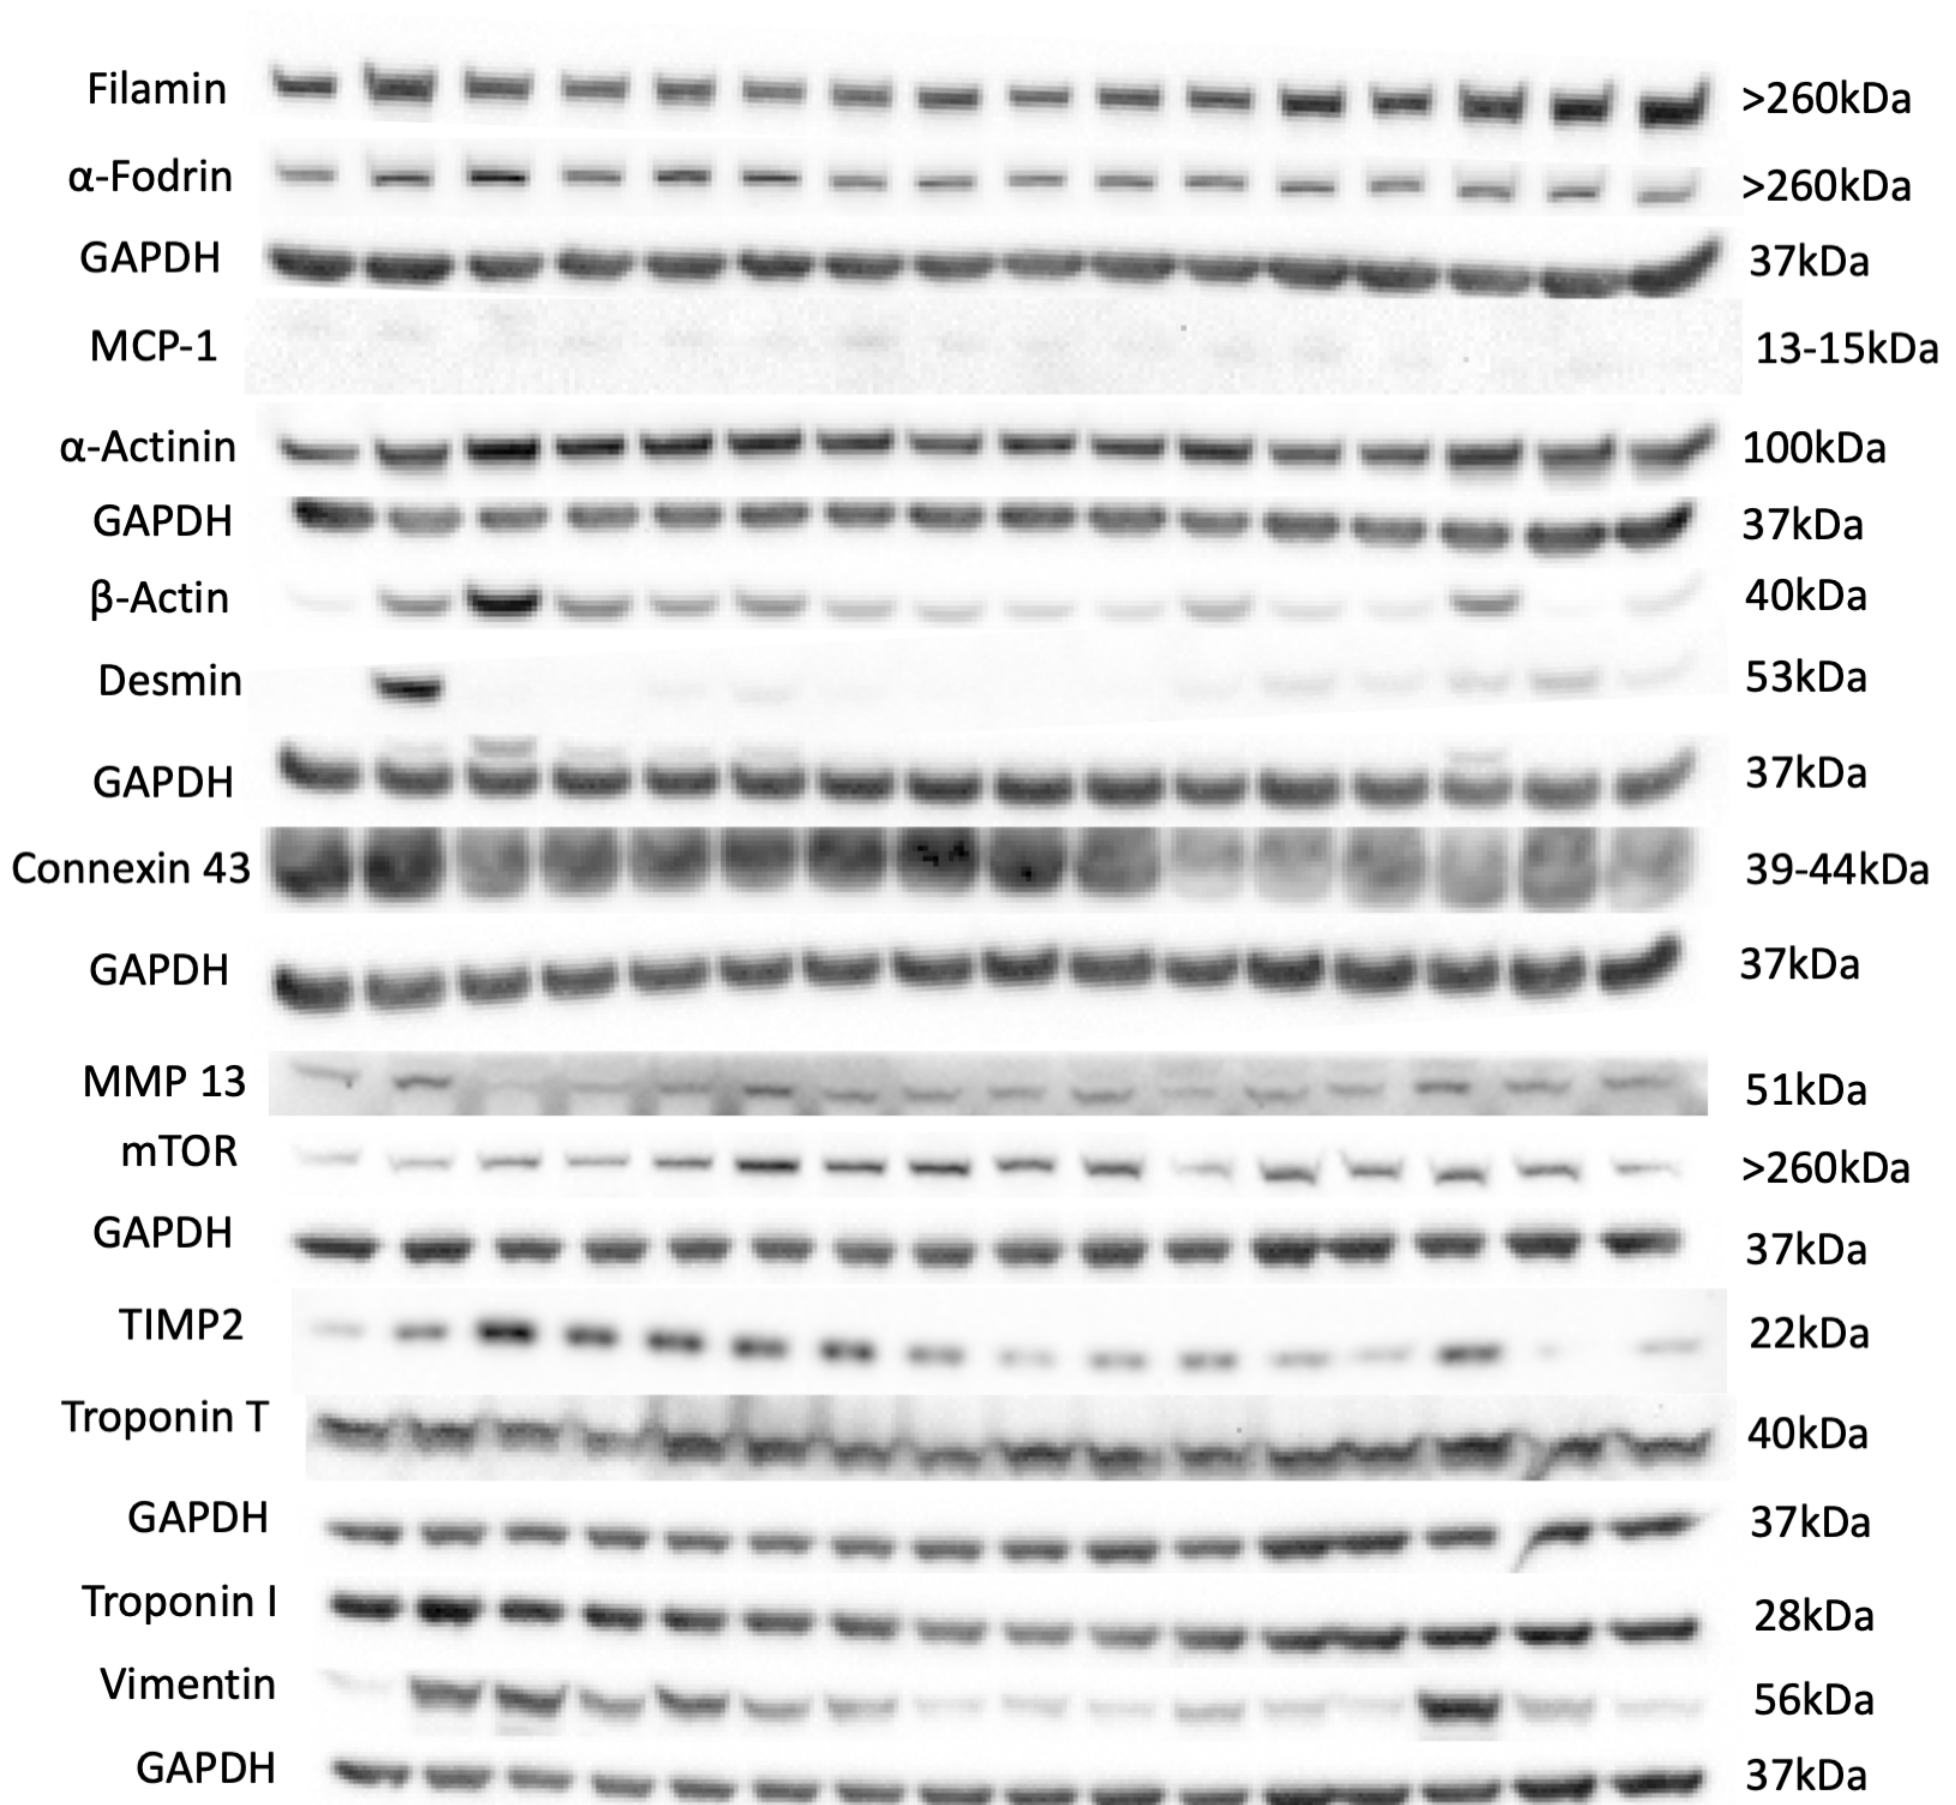

**Figure S2: Fibrosis-related western blot bands.** Complete western blot bands displayed for protein quantification. Bands were normalized to glyceraldehyde-3-phosphate dehydrogenase (GAPDH). MMP13, matrix metalloproteinase 13; TIMP2, tissue inhibitor of metalloproteinase 2; MCP-1, monocyte chemoattractant protein-1; mTOR, mammalian target of rapamycin.



**FIGURE S3**

### **TUNEL Staining**

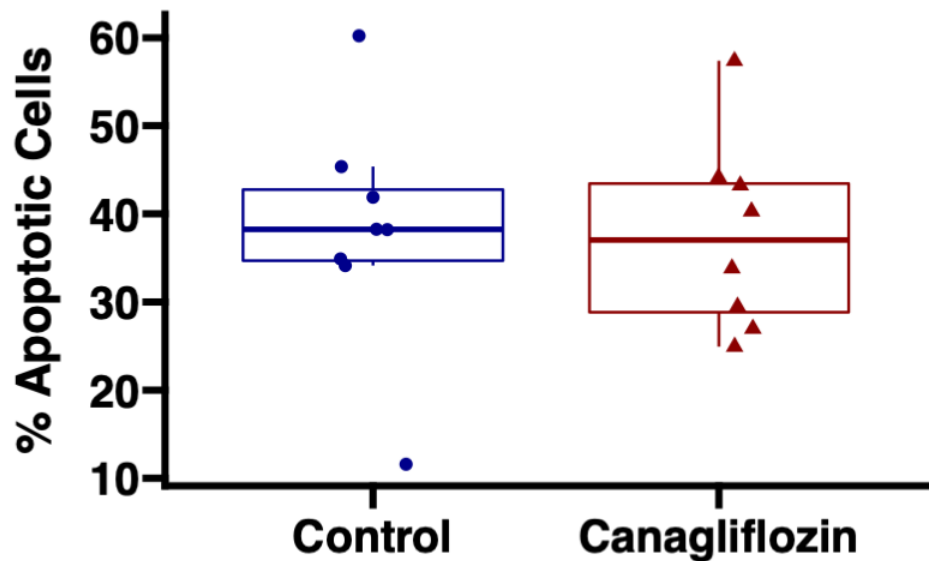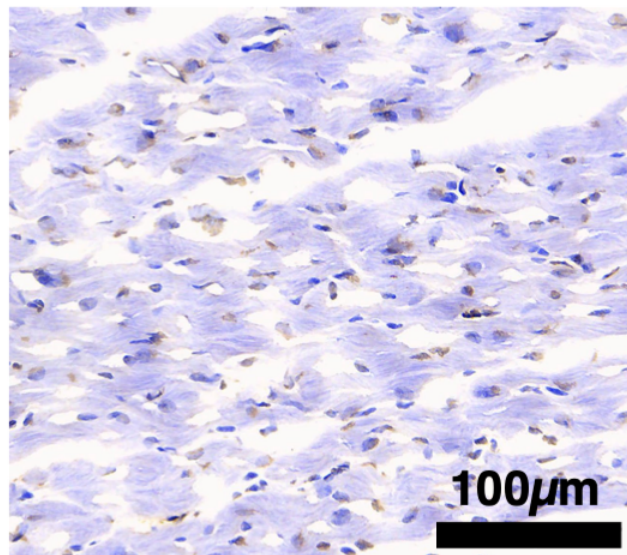

**CON**

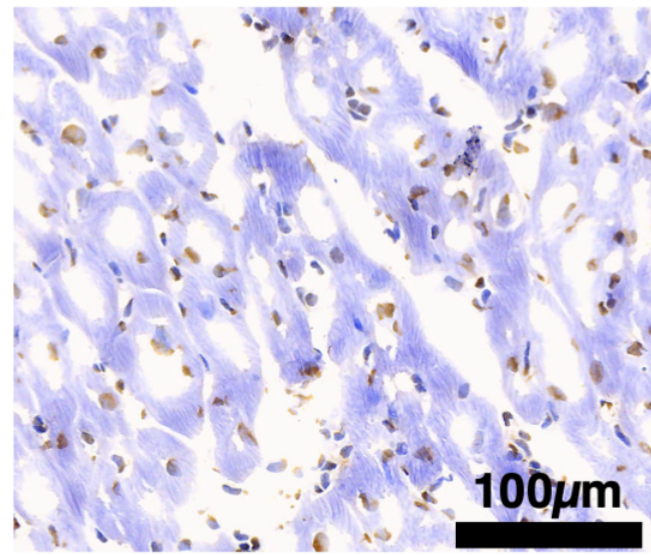

**CANA**

**Figure S3: Canagliflozin therapy has no effect on apoptosis in chronically ischemic myocardial tissue.** There were no differences in percentage of apoptotic cells in ischemic myocardium as measured by terminal deoxynucleotidyl transferase dUTP nick end labeling (TUNEL) staining between canagliflozin-treated pigs (CANA, n=8) and control (CON, n=8). Representative images of TUNEL staining in ischemic myocardial tissue shown. Upper and lower borders of box represent upper and lower quartiles, middle horizontal line represents median, upper and lower whiskers represent maximum and minimum values.
